# Supplementary material
Source: Springer Nature journal article supplement (https://www.springermedizin.de/resource/supplementary/12889_2010_3131_MOESM1_ESM.pdf/9488232)

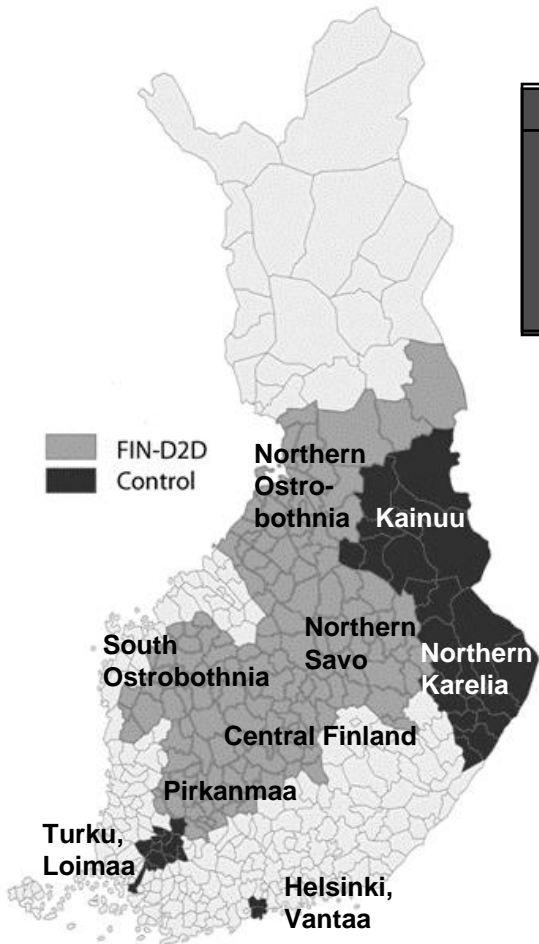

| FINRISK 2002                                                  |                                           |
|---------------------------------------------------------------|-------------------------------------------|
| Northern Karelia<br>Kainuu<br>Turku-Loimaa<br>Helsinki-Vantaa | Northern Savo<br>Northern<br>Ostrobothnia |
| N=2038                                                        | N=917                                     |

| FINRISK 2007                                                  |                                           |
|---------------------------------------------------------------|-------------------------------------------|
| Northern Karelia<br>Kainuu<br>Turku-Loimaa<br>Helsinki-Vantaa | Northern Savo<br>Northern<br>Ostrobothnia |
| N=2250                                                        | N=1294                                    |

| FIN-D2D 2004                                       |  |
|----------------------------------------------------|--|
| South Ostrobothnia<br>Central Finland<br>Pirkanmaa |  |
| N=2895                                             |  |

| FIN-D2D 2007                                       |  |
|----------------------------------------------------|--|
| South Ostrobothnia<br>Central Finland<br>Pirkanmaa |  |
| N=2862                                             |  |

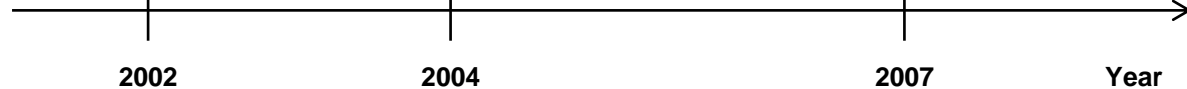

Supplement: MOESM1 [file 9488232]
